# Supplementary material for: Photoluminescent carbon nitride films grown by vapor transport of carbon nitride powdersElectronic supplementary information (ESI) available: complete experimental procedures, characterization information, Auger spectra. See http://www.rsc.org/suppdata/cc/b2/b207041c/.
Source: Royal Society of Chemistry journal article supplement (doi:10.1039/b207041c), 2002-09-10
Supplement: b207041c.doc [file b207041c.doc]

Electronic Supplementary information for article by Wang, Miller, and Gillan entitled “Photoluminescent carbon nitride films grown by vapor transport of carbon nitride powders”.

**Experimental Procedures**

**Film deposition.** The powders utilized in this work were synthesized as described previously (see text for references). The TCM-C3N5 powder was a free flowing powder, while the TAT-C3N5 material consisted of millimeter-sized brittle pieces. Typically 20 mg of the carbon nitride material was placed in an alumina boat that was inserted into a silica tube that was sealed on one end. The substrates were placed in the tube near the open end with the Si(111) wafer closer to the boat and the SiO2 closer to the open end of the tube. This assembly was placed in a larger silica flow tube in a clamshell furnace. The smaller silica tube was positioned such that its open end was pointed away from the argon gas flow (see Figure 1 in the article). The system was evacuated to 10 mTorr and refilled with argon (Air Products, UHP carrier grade). The flow rate was maintained at 10 - 20 sccm. Based on previous thermogravimetric analysis, the TCM and TAT powder were heated to 600 ºC and 650 ºC, respectively, to achieve appreciable evaporation and recondensation rates. Since the inner silica tube was shielded from direct argon flow, the evaporation/diffusion process was moderate at these temperatures and each deposition was held at temperature overnight (> 12 hours) to ensure complete evaporation. The TAT deposition was somewhat faster than the TCM deposition. In either case, it is likely that the films on the substrates were subjected to 250 - 350 ºC temperatures for at least 6 hours after the deposition was completed.

**Film characterization.** IR spectroscopy was performed on films on Si using a Nicolet Nexus 670 spectrometer. Films on SiO2 substrates were analyzed by UV-vis spectroscopy (HP8453 diode array system). Room temperature photoluminescence measurements were performed on films deposited on Si using a Shimadzu RF-1501 spectrofluorophotometer. The films were illuminated at nearly 60º off of normal to reduce scattering radiation. Auger spectroscopy was obtained with a Perkin-Elmer scanning Auger system using a 3 KeV and 0.5 mA electron beam. Powder X-ray diffraction measurements were performed on films on Si and SiO2 using a Siemens D5000 diffractometer. Films on Si were analyzed by Raman spectroscopy using a Hololab 5000R Modular Research spectrometer (785 nm laser). Scanning electron microscopy was performed on a Hitachi S4000 field emission system operating at 5 KeV.

Electronic Supplementary information for article by Wang, Miller, and Gillan entitled “Photoluminescent carbon nitride films grown by vapor transport of carbon nitride powders”.

**Auger Spectroscopy Analysis**

Semiquantitative analysis was performed using experimentally determined sensitivity factors (SC/SN = 0.93) from SiC, Si3N4, and polyaniline standards, which were within the range of values quoted in the *Handbook of Auger Electron Spectroscopy* (Perkin Elmer Corp. - Physical Electronics Division, Eden Prairie, Minnesota, 1978). The films were transferred in air and are unsputtered. The compositions in the text are based on an average of multiple areas on the film. The atomic ratios were calculated as N/C = (IN/IC)(SC/SN). The peak intensities were taken as the maximum to minimum points on each derivative curve.
